# Supplementary material for: High performance hierarchical porous carbon derived from distinctive plant tissue for supercapacitor
Source: Springer Nature journal article supplement (doi:10.1038/s41598-019-53869-w), 2019-11-21
Supplement: 41598_2019_53869_MOESM1_ESM.pdf [file 41598_2019_53869_MOESM1_ESM.pdf]

Supporting Information

**High performance hierarchical porous carbon  
derived from distinctive plant tissue  
for supercapacitor**

**Authors**

Jinxiao Li, Yang Gao, Kuihua Han<sup>z</sup>, Jianhui Qi, Ming Li, Zhaocai Teng

( School of Energy and Power Engineering, Shandong University, 250061 Jinan, PR

China)

(<sup>z</sup>Email : [hankh@163.com](mailto:hankh@163.com);

Address: No.17923 Jingshi Road, Lixia District, Jinan, Shandong Province

250061, P.R. China; Tel: +8613589033524, Fax: +86-531-88392414)

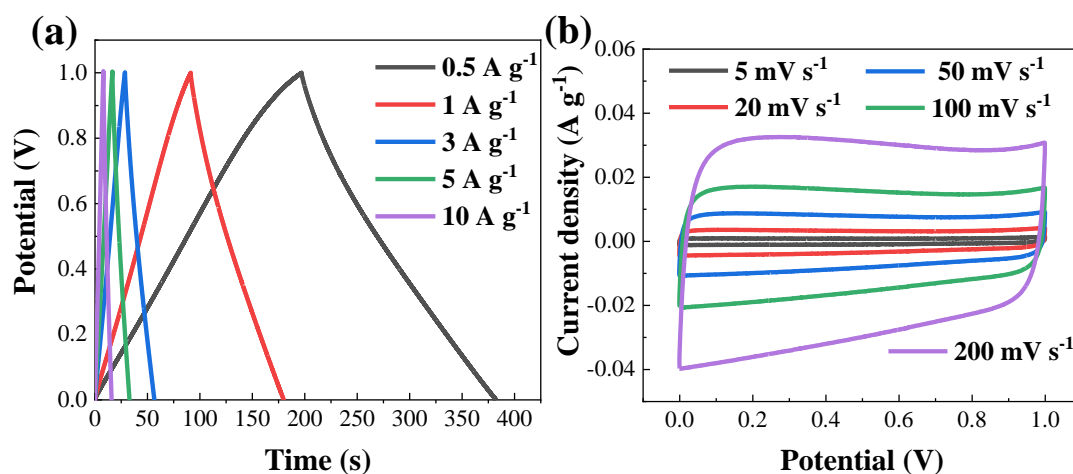

**Figure S1.** GCD and CV curves of OPC (a) GCD curves of OPC at different current density (b) CV curves of OPC at different scan rate

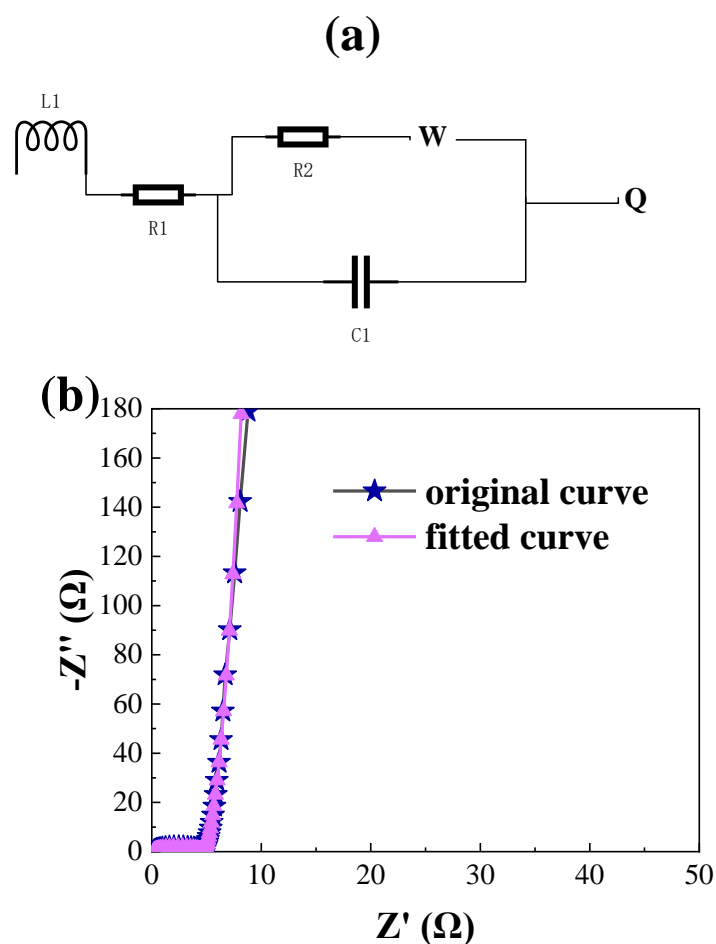

**Figure S2.** Simulated result of equivalent circuit (a) The equivalent circuit diagram of tested supercapacitor made by SPC (b) The comparison diagram between fitting curve and the original curve

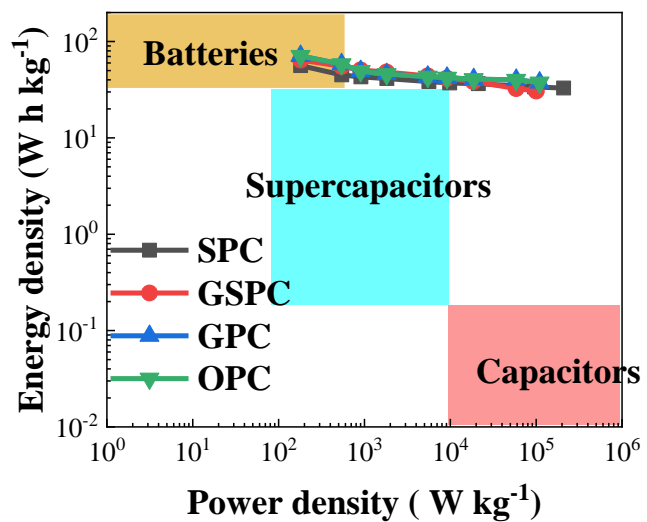

Figure S3. Power density and Energy density of 4 PC samples

**Table S1** Characteristics of pores in carbonized garlic sprout before and after acid pickling

| Sample | SSA                            | $V_T$                           | $V_{\text{micro}}$              | D (nm) | $D_{\text{micro}}$ (nm) |
|--------|--------------------------------|---------------------------------|---------------------------------|--------|-------------------------|
|        | ( $\text{m}^2 \text{g}^{-1}$ ) | ( $\text{cm}^3 \text{g}^{-1}$ ) | ( $\text{cm}^3 \text{g}^{-1}$ ) |        |                         |
| Before | 7.70                           | 0.084                           | —                               | 9.91   | —                       |
| After  | 56.26                          | 0.116                           | 0.022                           | 5.04   | 0.40                    |

**Table S2** Specific capacitance under different current density

| Sample | Current density ( $\text{A g}^{-1}$ ) |     |     |     |     |
|--------|---------------------------------------|-----|-----|-----|-----|
|        | 0.1                                   | 1   | 5   | 10  | 50  |
| GSPC   | 513                                   | 364 | 334 | 321 | 279 |
| GPC    | 514                                   | 385 | 331 | 305 | 239 |
| OPC    | 568                                   | 367 | 335 | 323 | 294 |
| SPC    | 450                                   | 330 | 296 | 289 | 245 |

**Table S3** EDS analysis of garlic seedling

| Element | Wt%        | At%   |
|---------|------------|-------|
| C K     | 10.57      | 18.44 |
| O K     | 41.21      | 53.99 |
| Mg K    | 1.55       | 1.34  |
| P K     | 3.88       | 2.63  |
| S K     | 4.59       | 3.00  |
| Cl K    | 3.45       | 2.04  |
| K K     | 29.60      | 15.87 |
| Ca K    | 5.14       | 2.69  |
| Matrix  | Correction | ZAF   |

**Table S4** EDS analysis of GSPC

| Element | Wt%        | At%   |
|---------|------------|-------|
| C K     | 52.3       | 59.36 |
| O K     | 47.7       | 40.64 |
| Matrix  | Correction | ZAF   |
